# Supplementary material
Source: MDPI journal article supplement (https://www.mdpi.com/2072-4292/15/9/2359)
Supplement: s1 [file s1]

**Table S1.** Values of correlation coefficients between spectral bands and WQPs.

| Parameters                    | <b>b<sub>1</sub></b> | <b>b<sub>2</sub></b> | <b>b<sub>3</sub></b> | <b>b<sub>4</sub></b> | <b>b<sub>5</sub></b> | <b>b<sub>6</sub></b> | <b>b<sub>7</sub></b> | <b>b<sub>8</sub></b> | <b>b<sub>9</sub></b> | <b>b<sub>10</sub></b> | <b>b<sub>11</sub></b> |
|-------------------------------|----------------------|----------------------|----------------------|----------------------|----------------------|----------------------|----------------------|----------------------|----------------------|-----------------------|-----------------------|
| Tur                           | -0.663               | -0.618               | -0.532               | -0.348               | -0.579               | 0.760                | 0.535                | -0.243               | -0.015               | -0.831                | -0.841                |
| SO <sub>4</sub> <sup>2-</sup> | -0.559               | -0.933               | -0.767               | -0.250               | 0.192                | 0.861                | 0.319                | -0.059               | 0.335                | 0.815                 | 0.647                 |
| Na <sup>+</sup>               | 0.272                | 0.678                | 0.377                | 0.561                | 0.353                | -0.462               | -0.004               | 0.308                | -0.866               | -0.468                | -0.738                |
| K <sup>+</sup>                | -0.511               | -0.617               | -0.390               | -0.213               | -0.665               | 0.755                | 0.467                | -0.281               | -0.216               | -0.828                | -0.775                |
| pH                            | 0.467                | 0.586                | 0.450                | 0.500                | 0.233                | 0.617                | 0.683                | 0.383                | -0.427               | 0.883                 | 0.917                 |
| NO <sub>3</sub> <sup>-</sup>  | -0.686               | -0.782               | -0.703               | -0.762               | -0.435               | -0.854               | -0.812               | -0.678               | 0.563                | -0.812                | -0.837                |
| Mg <sup>2+</sup>              | -0.477               | -0.711               | -0.385               | -0.017               | 0.218                | 0.593                | -0.072               | -0.274               | 0.487                | 0.557                 | 0.865                 |
| Hardness                      | -0.872               | -0.689               | -0.412               | 0.193                | 0.127                | 0.694                | 0.254                | 0.153                | 0.346                | 0.521                 | 0.669                 |
| F <sup>-</sup>                | -0.296               | -0.556               | -0.402               | -0.043               | 0.069                | 0.377                | -0.285               | -0.526               | 0.404                | 0.444                 | 0.729                 |
| Cl <sup>-</sup>               | -0.628               | -0.710               | -0.475               | -0.288               | -0.745               | 0.747                | 0.415                | -0.330               | -0.080               | -0.884                | -0.850                |
| AS                            | 0.595                | 0.686                | 0.469                | 0.269                | 0.721                | -0.832               | -0.472               | 0.338                | 0.148                | 0.914                 | 0.882                 |
| Alk                           | 0.335                | 0.760                | 0.776                | 0.338                | 0.161                | -0.500               | -0.336               | 0.081                | -0.250               | -0.549                | -0.285                |
| DO                            | -0.595               | -0.686               | -0.469               | -0.269               | -0.721               | 0.832                | 0.472                | -0.338               | -0.148               | -0.914                | -0.882                |

**Table S2.** Correlation coefficients between ratios of band indices and WQPs

| band indices                   | DO    | pH    | Mg    | Na <sup>+</sup> | SO <sub>4</sub> <sup>2-</sup> | Hardness | Alk   | AS    | F <sup>-</sup> | NO <sub>3</sub> <sup>-</sup> | K <sup>+</sup> | Cl <sup>-</sup> | Tur   |
|--------------------------------|-------|-------|-------|-----------------|-------------------------------|----------|-------|-------|----------------|------------------------------|----------------|-----------------|-------|
| b <sub>1</sub> /b <sub>2</sub> | 0.56  | 0.15  | -0.14 | -0.12           | 0.37                          | 0.29     | -0.60 | -0.56 | -0.15          | -0.50                        | 0.54           | 0.47            | 0.41  |
| b <sub>1</sub> /b <sub>3</sub> | 0.04  | -0.60 | 0.25  | 0.16            | -0.17                         | 0.14     | 0.26  | -0.04 | 0.21           | 0.52                         | 0.04           | -0.03           | 0.09  |
| b <sub>1</sub> /b <sub>4</sub> | -0.08 | -0.65 | -0.28 | 0.42            | -0.67                         | -0.31    | 0.61  | 0.08  | -0.26          | 0.88                         | -0.08          | -0.12           | -0.02 |
| b <sub>1</sub> /b <sub>5</sub> | 0.08  | -0.40 | 0.40  | -0.28           | -0.15                         | 0.04     | 0.35  | -0.08 | 0.38           | 0.45                         | 0.09           | 0.02            | -0.06 |
| b <sub>1</sub> /b <sub>6</sub> | -0.86 | -0.62 | -0.20 | 0.40            | -0.65                         | -0.25    | 0.64  | 0.86  | -0.15          | 0.85                         | -0.77          | -0.84           | -0.82 |
| b <sub>1</sub> /b <sub>7</sub> | -0.65 | -0.75 | -0.10 | 0.28            | -0.55                         | -0.17    | 0.57  | 0.65  | -0.15          | 0.85                         | -0.59          | -0.62           | -0.72 |

|              |       |       |       |       |       |       |       |       |       |       |       |       |       |
|--------------|-------|-------|-------|-------|-------|-------|-------|-------|-------|-------|-------|-------|-------|
| $b_1/b_8$    | -0.53 | 0.08  | 0.47  | -0.12 | 0.65  | 0.74  | -0.51 | 0.53  | 0.19  | -0.26 | -0.48 | -0.56 | -0.59 |
| $b_1/b_9$    | -0.51 | 0.48  | 0.88  | -0.70 | 0.67  | 0.36  | -0.25 | 0.50  | 0.84  | -0.61 | -0.41 | -0.55 | -0.58 |
| $b_1/b_{10}$ | -0.56 | -0.50 | 0.28  | -0.36 | 0.18  | 0.48  | -0.30 | 0.56  | 0.23  | 0.18  | -0.47 | -0.60 | -0.63 |
| $b_1/b_{11}$ | -0.60 | -0.35 | 0.22  | -0.44 | 0.27  | 0.41  | -0.46 | 0.60  | 0.15  | 0.03  | -0.51 | -0.63 | -0.66 |
| $b_2/b_3$    | -0.63 | -0.42 | 0.18  | 0.21  | -0.33 | -0.17 | 0.44  | 0.63  | 0.22  | 0.56  | -0.57 | -0.64 | -0.46 |
| $b_2/b_4$    | -0.73 | -0.50 | -0.11 | 0.37  | -0.62 | -0.41 | 0.63  | 0.73  | -0.01 | 0.74  | -0.66 | -0.73 | -0.56 |
| $b_2/b_5$    | -0.58 | -0.25 | 0.43  | -0.25 | -0.17 | -0.04 | 0.38  | 0.58  | 0.50  | 0.38  | -0.49 | -0.56 | -0.63 |
| $b_2/b_6$    | -0.88 | -0.62 | -0.20 | 0.40  | -0.65 | -0.25 | 0.64  | 0.88  | -0.15 | 0.85  | -0.79 | -0.85 | -0.80 |
| $b_2/b_7$    | -0.63 | -0.75 | -0.10 | 0.28  | -0.55 | -0.17 | 0.57  | 0.63  | -0.15 | 0.85  | -0.57 | -0.61 | -0.66 |
| $b_2/b_8$    | -0.56 | 0.30  | 0.61  | -0.01 | 0.57  | 0.52  | -0.29 | 0.56  | 0.39  | -0.20 | -0.51 | -0.58 | -0.59 |
| $b_2/b_9$    | -0.53 | 0.48  | 0.88  | -0.70 | 0.67  | 0.36  | -0.25 | 0.53  | 0.84  | -0.61 | -0.43 | -0.57 | -0.59 |
| $b_2/b_{10}$ | -0.54 | -0.47 | 0.36  | -0.37 | 0.20  | 0.58  | -0.26 | 0.54  | 0.28  | 0.26  | -0.46 | -0.58 | -0.56 |
| $b_2/b_{11}$ | -0.58 | -0.38 | 0.37  | -0.53 | 0.22  | 0.39  | -0.32 | 0.58  | 0.31  | 0.18  | -0.50 | -0.61 | -0.58 |
| $b_3/b_4$    | 0.10  | -0.72 | -0.64 | 0.53  | -0.92 | -0.72 | 0.72  | -0.10 | -0.56 | 0.86  | 0.04  | 0.14  | 0.12  |
| $b_3/b_5$    | -0.10 | -0.37 | 0.24  | -0.25 | -0.30 | -0.03 | 0.43  | 0.10  | 0.30  | 0.54  | -0.06 | -0.05 | -0.23 |
| $b_3/b_6$    | -0.69 | -0.62 | -0.20 | 0.40  | -0.65 | -0.25 | 0.64  | 0.69  | -0.15 | 0.85  | -0.58 | -0.67 | -0.74 |
| $b_3/b_7$    | -0.45 | -0.75 | -0.10 | 0.28  | -0.55 | -0.17 | 0.57  | 0.45  | -0.15 | 0.85  | -0.44 | -0.41 | -0.54 |
| $b_3/b_8$    | -0.56 | 0.55  | 0.25  | -0.34 | 0.73  | 0.38  | -0.65 | 0.56  | 0.00  | -0.73 | -0.51 | -0.56 | -0.63 |
| $b_3/b_9$    | -0.27 | 0.48  | 0.88  | -0.70 | 0.67  | 0.36  | -0.25 | 0.27  | 0.84  | -0.61 | -0.18 | -0.30 | -0.35 |
| $b_3/b_{10}$ | -0.30 | 0.05  | 0.42  | -0.71 | 0.53  | 0.55  | -0.58 | 0.30  | 0.32  | -0.28 | -0.22 | -0.32 | -0.37 |
| $b_3/b_{11}$ | -0.33 | 0.17  | 0.34  | -0.62 | 0.58  | 0.53  | -0.73 | 0.33  | 0.31  | -0.43 | -0.26 | -0.34 | -0.40 |
| $b_4/b_5$    | -0.01 | -0.05 | 0.62  | -0.52 | 0.23  | 0.37  | 0.04  | 0.01  | 0.48  | 0.20  | 0.02  | 0.02  | -0.15 |
| $b_4/b_6$    | -0.66 | -0.63 | -0.18 | 0.28  | -0.67 | -0.28 | 0.66  | 0.66  | -0.12 | 0.87  | -0.57 | -0.63 | -0.71 |
| $b_4/b_7$    | -0.45 | -0.75 | -0.10 | 0.28  | -0.55 | -0.17 | 0.57  | 0.45  | -0.15 | 0.85  | -0.42 | -0.40 | -0.54 |
| $b_4/b_8$    | -0.34 | 0.62  | 0.31  | -0.49 | 0.73  | 0.38  | -0.53 | 0.34  | 0.05  | -0.77 | -0.29 | -0.35 | -0.41 |
| $b_4/b_9$    | -0.23 | 0.48  | 0.88  | -0.70 | 0.67  | 0.36  | -0.25 | 0.23  | 0.84  | -0.61 | -0.14 | -0.27 | -0.31 |
| $b_4/b_{10}$ | -0.24 | 0.42  | 0.39  | -0.52 | 0.77  | 0.66  | -0.84 | 0.24  | 0.32  | -0.64 | -0.18 | -0.27 | -0.32 |
| $b_4/b_{11}$ | -0.27 | 0.42  | 0.39  | -0.52 | 0.77  | 0.66  | -0.84 | 0.27  | 0.32  | -0.64 | -0.22 | -0.29 | -0.35 |
| $b_5/b_6$    | -0.91 | -0.65 | -0.28 | 0.42  | -0.67 | -0.31 | 0.61  | 0.91  | -0.26 | 0.88  | -0.84 | -0.86 | -0.81 |
| $b_5/b_7$    | -0.86 | -0.82 | -0.32 | 0.42  | -0.68 | -0.22 | 0.69  | 0.86  | -0.37 | 0.89  | -0.82 | -0.81 | -0.76 |
| $b_5/b_8$    | -0.63 | 0.37  | -0.24 | 0.25  | 0.30  | 0.03  | -0.43 | 0.63  | -0.30 | -0.54 | -0.60 | -0.65 | -0.48 |
| $b_5/b_9$    | -0.51 | 0.18  | 0.58  | -0.25 | 0.37  | 0.21  | -0.03 | 0.51  | 0.53  | -0.31 | -0.41 | -0.55 | -0.57 |

|                 |       |       |       |       |       |       |       |       |       |       |       |       |       |
|-----------------|-------|-------|-------|-------|-------|-------|-------|-------|-------|-------|-------|-------|-------|
| $b_5/b_{10}$    | -0.68 | 0.15  | -0.16 | 0.08  | 0.32  | 0.29  | -0.47 | 0.68  | -0.21 | -0.41 | -0.62 | -0.71 | -0.54 |
| $b_5/b_{11}$    | -0.71 | 0.20  | -0.16 | 0.07  | 0.33  | 0.19  | -0.51 | 0.71  | -0.21 | -0.46 | -0.65 | -0.74 | -0.56 |
| $b_6/b_7$       | -0.38 | 0.32  | 0.09  | -0.15 | 0.55  | 0.55  | -0.49 | 0.38  | -0.17 | -0.44 | -0.39 | -0.35 | -0.45 |
| $b_6/b_8$       | 0.83  | 0.62  | 0.20  | -0.40 | 0.65  | 0.25  | -0.64 | -0.83 | 0.15  | -0.85 | 0.73  | 0.78  | 0.74  |
| $b_6/b_9$       | 0.49  | 0.48  | 0.88  | -0.70 | 0.67  | 0.36  | -0.25 | -0.49 | 0.84  | -0.61 | 0.50  | 0.42  | 0.35  |
| $b_6/b_{10}$    | 0.86  | 0.53  | 0.13  | -0.37 | 0.62  | 0.29  | -0.64 | -0.86 | 0.03  | -0.78 | 0.78  | 0.78  | 0.78  |
| $b_6/b_{11}$    | 0.86  | 0.53  | 0.13  | -0.37 | 0.62  | 0.29  | -0.64 | -0.86 | 0.03  | -0.78 | 0.78  | 0.79  | 0.79  |
| $b_7/b_8$       | 0.46  | 0.75  | 0.10  | -0.28 | 0.55  | 0.17  | -0.57 | -0.46 | 0.15  | -0.85 | 0.41  | 0.40  | 0.52  |
| $b_7/b_9$       | 0.64  | 0.48  | 0.88  | -0.70 | 0.67  | 0.36  | -0.25 | -0.64 | 0.84  | -0.61 | 0.65  | 0.56  | 0.54  |
| $b_7/b_{10}$    | 0.47  | 0.58  | 0.22  | -0.42 | 0.67  | 0.30  | -0.73 | -0.47 | 0.21  | -0.84 | 0.47  | 0.41  | 0.53  |
| $b_7/b_{11}$    | 0.47  | 0.62  | 0.09  | -0.34 | 0.60  | 0.20  | -0.73 | -0.47 | 0.09  | -0.81 | 0.46  | 0.41  | 0.54  |
| $b_8/b_9$       | -0.08 | 0.48  | 0.88  | -0.70 | 0.67  | 0.36  | -0.25 | 0.08  | 0.84  | -0.61 | 0.00  | -0.14 | -0.19 |
| $b_8/b_{10}$    | -0.23 | -0.55 | 0.25  | -0.49 | 0.03  | 0.19  | -0.19 | 0.23  | 0.31  | 0.19  | -0.19 | -0.23 | -0.13 |
| $b_8/b_{11}$    | -0.26 | -0.37 | 0.26  | -0.59 | 0.13  | 0.18  | -0.32 | 0.26  | 0.34  | 0.02  | -0.22 | -0.24 | -0.15 |
| $b_9/b_{10}$    | -0.03 | -0.47 | -0.90 | 0.69  | -0.65 | -0.30 | 0.22  | 0.03  | -0.86 | 0.59  | -0.10 | 0.03  | 0.09  |
| $b_9/b_{11}$    | -0.05 | -0.47 | -0.90 | 0.69  | -0.65 | -0.30 | 0.22  | 0.05  | -0.86 | 0.59  | -0.13 | 0.01  | 0.08  |
| $b_{10}/b_{11}$ | -0.55 | 0.48  | -0.34 | 0.34  | -0.17 | -0.59 | 0.14  | 0.55  | -0.28 | -0.19 | -0.56 | -0.50 | -0.36 |
| $b_{11}/b_{10}$ | 0.55  | -0.48 | 0.34  | -0.34 | 0.17  | 0.59  | -0.14 | -0.55 | 0.28  | 0.19  | 0.56  | 0.50  | 0.36  |
| $b_{11}/b_9$    | 0.05  | 0.47  | 0.90  | -0.69 | 0.65  | 0.30  | -0.22 | -0.05 | 0.86  | -0.59 | 0.13  | -0.01 | -0.08 |
| $b_{11}/b_8$    | 0.26  | 0.37  | -0.26 | 0.59  | -0.13 | -0.18 | 0.32  | -0.26 | -0.34 | -0.02 | 0.22  | 0.24  | 0.15  |
| $b_{11}/b_7$    | -0.47 | -0.62 | -0.09 | 0.34  | -0.60 | -0.20 | 0.73  | 0.47  | -0.09 | 0.81  | -0.46 | -0.41 | -0.54 |
| $b_{11}/b_6$    | -0.86 | -0.53 | -0.13 | 0.37  | -0.62 | -0.29 | 0.64  | 0.86  | -0.03 | 0.78  | -0.78 | -0.79 | -0.79 |
| $b_{11}/b_5$    | 0.71  | -0.20 | 0.16  | -0.07 | -0.33 | -0.19 | 0.51  | -0.71 | 0.21  | 0.46  | 0.65  | 0.74  | 0.56  |
| $b_{11}/b_4$    | 0.27  | -0.42 | -0.39 | 0.52  | -0.77 | -0.66 | 0.84  | -0.27 | -0.32 | 0.64  | 0.22  | 0.29  | 0.35  |
| $b_{11}/b_3$    | 0.33  | -0.17 | -0.34 | 0.62  | -0.58 | -0.53 | 0.73  | -0.33 | -0.31 | 0.43  | 0.26  | 0.34  | 0.40  |
| $b_{11}/b_2$    | 0.58  | 0.38  | -0.37 | 0.53  | -0.22 | -0.39 | 0.32  | -0.58 | -0.31 | -0.18 | 0.50  | 0.61  | 0.58  |
| $b_{11}/b_1$    | 0.60  | 0.35  | -0.22 | 0.44  | -0.27 | -0.41 | 0.46  | -0.60 | -0.15 | -0.03 | 0.51  | 0.63  | 0.66  |
| $b_{10}/b_9$    | 0.03  | 0.47  | 0.90  | -0.69 | 0.65  | 0.30  | -0.22 | -0.03 | 0.86  | -0.59 | 0.10  | -0.03 | -0.09 |
| $b_{10}/b_8$    | 0.23  | 0.55  | -0.25 | 0.49  | -0.03 | -0.19 | 0.19  | -0.23 | -0.31 | -0.19 | 0.19  | 0.23  | 0.13  |
| $b_{10}/b_7$    | -0.47 | -0.58 | -0.22 | 0.42  | -0.67 | -0.30 | 0.73  | 0.47  | -0.21 | 0.84  | -0.47 | -0.41 | -0.53 |
| $b_{10}/b_6$    | -0.86 | -0.53 | -0.13 | 0.37  | -0.62 | -0.29 | 0.64  | 0.86  | -0.03 | 0.78  | -0.78 | -0.78 | -0.78 |
| $b_{10}/b_5$    | 0.68  | -0.15 | 0.16  | -0.08 | -0.32 | -0.29 | 0.47  | -0.68 | 0.21  | 0.41  | 0.62  | 0.71  | 0.54  |

|                                 |       |       |       |       |       |       |       |       |       |       |       |       |       |
|---------------------------------|-------|-------|-------|-------|-------|-------|-------|-------|-------|-------|-------|-------|-------|
| b <sub>10</sub> /b <sub>4</sub> | 0.24  | -0.42 | -0.39 | 0.52  | -0.77 | -0.66 | 0.84  | -0.24 | -0.32 | 0.64  | 0.18  | 0.27  | 0.32  |
| b <sub>10</sub> /b <sub>3</sub> | 0.30  | -0.05 | -0.42 | 0.71  | -0.53 | -0.55 | 0.58  | -0.30 | -0.32 | 0.28  | 0.22  | 0.32  | 0.37  |
| b <sub>10</sub> /b <sub>2</sub> | 0.54  | 0.47  | -0.36 | 0.37  | -0.20 | -0.58 | 0.26  | -0.54 | -0.28 | -0.26 | 0.46  | 0.58  | 0.56  |
| b <sub>10</sub> /b <sub>1</sub> | 0.56  | 0.50  | -0.28 | 0.36  | -0.18 | -0.48 | 0.30  | -0.56 | -0.23 | -0.18 | 0.47  | 0.60  | 0.63  |
| b <sub>9</sub> /b <sub>8</sub>  | 0.08  | -0.48 | -0.88 | 0.70  | -0.67 | -0.36 | 0.25  | -0.08 | -0.84 | 0.61  | 0.00  | 0.14  | 0.19  |
| b <sub>9</sub> /b <sub>7</sub>  | -0.64 | -0.48 | -0.88 | 0.70  | -0.67 | -0.36 | 0.25  | 0.64  | -0.84 | 0.61  | -0.65 | -0.56 | -0.54 |
| b <sub>9</sub> /b <sub>6</sub>  | -0.49 | -0.48 | -0.88 | 0.70  | -0.67 | -0.36 | 0.25  | 0.49  | -0.84 | 0.61  | -0.50 | -0.42 | -0.35 |
| b <sub>9</sub> /b <sub>5</sub>  | 0.51  | -0.18 | -0.58 | 0.25  | -0.37 | -0.21 | 0.03  | -0.51 | -0.53 | 0.31  | 0.41  | 0.55  | 0.57  |
| b <sub>9</sub> /b <sub>4</sub>  | 0.23  | -0.48 | -0.88 | 0.70  | -0.67 | -0.36 | 0.25  | -0.23 | -0.84 | 0.61  | 0.14  | 0.27  | 0.31  |
| b <sub>9</sub> /b <sub>3</sub>  | 0.27  | -0.48 | -0.88 | 0.70  | -0.67 | -0.36 | 0.25  | -0.27 | -0.84 | 0.61  | 0.18  | 0.30  | 0.35  |
| b <sub>9</sub> /b <sub>2</sub>  | 0.53  | -0.48 | -0.88 | 0.70  | -0.67 | -0.36 | 0.25  | -0.53 | -0.84 | 0.61  | 0.43  | 0.57  | 0.59  |
| b <sub>9</sub> /b <sub>1</sub>  | 0.51  | -0.48 | -0.88 | 0.70  | -0.67 | -0.36 | 0.25  | -0.50 | -0.84 | 0.61  | 0.41  | 0.55  | 0.58  |
| b <sub>8</sub> /b <sub>7</sub>  | -0.46 | -0.75 | -0.10 | 0.28  | -0.55 | -0.17 | 0.57  | 0.46  | -0.15 | 0.85  | -0.41 | -0.40 | -0.52 |
| b <sub>8</sub> /b <sub>6</sub>  | -0.83 | -0.62 | -0.20 | 0.40  | -0.65 | -0.25 | 0.64  | 0.83  | -0.15 | 0.85  | -0.73 | -0.78 | -0.74 |
| b <sub>8</sub> /b <sub>5</sub>  | 0.63  | -0.37 | 0.24  | -0.25 | -0.30 | -0.03 | 0.43  | -0.63 | 0.30  | 0.54  | 0.60  | 0.65  | 0.48  |
| b <sub>8</sub> /b <sub>4</sub>  | 0.34  | -0.62 | -0.31 | 0.49  | -0.73 | -0.38 | 0.53  | -0.34 | -0.05 | 0.77  | 0.29  | 0.35  | 0.41  |
| b <sub>8</sub> /b <sub>3</sub>  | 0.56  | -0.55 | -0.25 | 0.34  | -0.73 | -0.38 | 0.65  | -0.56 | 0.00  | 0.73  | 0.51  | 0.56  | 0.63  |
| b <sub>8</sub> /b <sub>2</sub>  | 0.56  | -0.30 | -0.61 | 0.01  | -0.57 | -0.52 | 0.29  | -0.56 | -0.39 | 0.20  | 0.51  | 0.58  | 0.59  |
| b <sub>8</sub> /b <sub>1</sub>  | 0.51  | -0.48 | -0.88 | 0.70  | -0.67 | -0.36 | 0.25  | -0.50 | -0.84 | 0.61  | 0.41  | 0.55  | 0.58  |
| b <sub>7</sub> /b <sub>6</sub>  | 0.38  | -0.32 | -0.09 | 0.15  | -0.55 | -0.55 | 0.49  | -0.38 | 0.17  | 0.44  | 0.39  | 0.35  | 0.45  |
| b <sub>7</sub> /b <sub>5</sub>  | 0.86  | 0.82  | 0.32  | -0.42 | 0.68  | 0.22  | -0.69 | -0.86 | 0.37  | -0.89 | 0.82  | 0.81  | 0.76  |
| b <sub>7</sub> /b <sub>4</sub>  | 0.45  | 0.75  | 0.10  | -0.28 | 0.55  | 0.17  | -0.57 | -0.45 | 0.15  | -0.85 | 0.42  | 0.40  | 0.54  |
| b <sub>7</sub> /b <sub>3</sub>  | 0.45  | 0.75  | 0.10  | -0.28 | 0.55  | 0.17  | -0.57 | -0.45 | 0.15  | -0.85 | 0.44  | 0.41  | 0.54  |
| b <sub>7</sub> /b <sub>2</sub>  | 0.63  | 0.75  | 0.10  | -0.28 | 0.55  | 0.17  | -0.57 | -0.63 | 0.15  | -0.85 | 0.57  | 0.61  | 0.66  |
| b <sub>7</sub> /b <sub>1</sub>  | 0.65  | 0.75  | 0.10  | -0.28 | 0.55  | 0.17  | -0.57 | -0.65 | 0.15  | -0.85 | 0.59  | 0.62  | 0.72  |
| b <sub>6</sub> /b <sub>5</sub>  | 0.91  | 0.65  | 0.28  | -0.42 | 0.67  | 0.31  | -0.61 | -0.91 | 0.26  | -0.88 | 0.84  | 0.86  | 0.81  |
| b <sub>6</sub> /b <sub>4</sub>  | 0.66  | 0.63  | 0.18  | -0.28 | 0.67  | 0.28  | -0.66 | -0.66 | 0.12  | -0.87 | 0.57  | 0.63  | 0.71  |
| b <sub>6</sub> /b <sub>3</sub>  | 0.69  | 0.62  | 0.20  | -0.40 | 0.65  | 0.25  | -0.64 | -0.69 | 0.15  | -0.85 | 0.58  | 0.67  | 0.74  |
| b <sub>6</sub> /b <sub>2</sub>  | 0.88  | 0.62  | 0.20  | -0.40 | 0.65  | 0.25  | -0.64 | -0.88 | 0.15  | -0.85 | 0.79  | 0.85  | 0.80  |
| b <sub>6</sub> /b <sub>1</sub>  | 0.86  | 0.62  | 0.20  | -0.40 | 0.65  | 0.25  | -0.64 | -0.86 | 0.15  | -0.85 | 0.77  | 0.84  | 0.82  |
| b <sub>5</sub> /b <sub>4</sub>  | 0.01  | 0.05  | -0.62 | 0.52  | -0.23 | -0.37 | -0.04 | -0.01 | -0.48 | -0.20 | -0.02 | -0.02 | 0.15  |
| b <sub>5</sub> /b <sub>3</sub>  | 0.10  | 0.37  | -0.24 | 0.25  | 0.30  | 0.03  | -0.43 | -0.10 | -0.30 | -0.54 | 0.06  | 0.05  | 0.23  |

|                               |       |       |       |       |       |       |       |       |       |       |       |       |       |
|-------------------------------|-------|-------|-------|-------|-------|-------|-------|-------|-------|-------|-------|-------|-------|
| $b_5/b_2$                     | 0.58  | 0.25  | -0.43 | 0.25  | 0.17  | 0.04  | -0.38 | -0.58 | -0.50 | -0.38 | 0.49  | 0.56  | 0.63  |
| $b_5/b_1$                     | -0.08 | 0.40  | -0.40 | 0.28  | 0.15  | -0.04 | -0.35 | 0.08  | -0.38 | -0.45 | -0.09 | -0.02 | 0.06  |
| $b_4/b_3$                     | -0.10 | 0.72  | 0.64  | -0.53 | 0.92  | 0.72  | -0.72 | 0.10  | 0.56  | -0.86 | -0.04 | -0.14 | -0.12 |
| $b_4/b_2$                     | 0.73  | 0.50  | 0.11  | -0.37 | 0.62  | 0.41  | -0.63 | -0.73 | 0.01  | -0.74 | 0.66  | 0.73  | 0.56  |
| $b_4/b_1$                     | 0.08  | 0.65  | 0.28  | -0.42 | 0.67  | 0.31  | -0.61 | -0.08 | 0.26  | -0.88 | 0.08  | 0.12  | 0.02  |
| $b_3/b_2$                     | 0.63  | 0.42  | -0.18 | -0.21 | 0.33  | 0.17  | -0.44 | -0.63 | -0.22 | -0.56 | 0.57  | 0.64  | 0.46  |
| $b_3/b_1$                     | -0.04 | 0.60  | -0.25 | -0.16 | 0.17  | -0.14 | -0.26 | 0.04  | -0.21 | -0.52 | -0.04 | 0.03  | -0.09 |
| $b_2/b_1$                     | -0.56 | -0.15 | 0.14  | 0.12  | -0.37 | -0.29 | 0.60  | 0.56  | 0.15  | 0.50  | -0.54 | -0.47 | -0.41 |
| $b_{11}-b_{10}/b_{11}+b_{10}$ | 0.55  | -0.58 | 0.46  | -0.53 | 0.07  | 0.39  | 0.01  | -0.55 | 0.44  | 0.29  | 0.56  | 0.50  | 0.36  |
| $b_{11}-b_9/b_{11}+b_9$       | 0.05  | 0.47  | 0.90  | -0.69 | 0.65  | 0.30  | -0.22 | -0.05 | 0.86  | -0.59 | 0.13  | -0.01 | -0.07 |
| $b_{11}-b_8/b_{11}+b_8$       | 0.26  | -0.33 | -0.14 | 0.46  | -0.57 | -0.34 | 0.75  | -0.26 | -0.12 | 0.62  | 0.22  | 0.24  | 0.15  |
| $b_{11}-b_7/b_{11}+b_7$       | -0.47 | -0.68 | -0.04 | 0.28  | -0.55 | -0.16 | 0.70  | 0.47  | -0.09 | 0.81  | -0.46 | -0.41 | -0.54 |
| $b_{11}-b_6/b_{11}+b_6$       | -0.86 | -0.62 | -0.20 | 0.40  | -0.65 | -0.25 | 0.64  | 0.86  | -0.15 | 0.85  | -0.78 | -0.79 | -0.79 |
| $b_{11}-b_5/b_{11}+b_5$       | 0.71  | -0.23 | 0.28  | -0.14 | -0.27 | -0.09 | 0.51  | -0.71 | 0.32  | 0.44  | 0.65  | 0.74  | 0.56  |
| $b_{11}-b_4/b_{11}+b_4$       | 0.27  | -0.50 | -0.14 | 0.38  | -0.63 | -0.34 | 0.73  | -0.27 | -0.09 | 0.76  | 0.22  | 0.29  | 0.35  |
| $b_{11}-b_3/b_{11}+b_3$       | 0.33  | -0.45 | -0.18 | 0.42  | -0.67 | -0.41 | 0.79  | -0.33 | -0.09 | 0.70  | 0.26  | 0.34  | 0.40  |
| $b_{11}-b_2/b_{11}+b_2$       | 0.58  | -0.55 | -0.47 | 0.57  | -0.82 | -0.52 | 0.88  | -0.58 | -0.43 | 0.76  | 0.50  | 0.61  | 0.58  |
| $b_{11}-b_1/b_{11}+b_1$       | 0.60  | -0.47 | -0.39 | 0.54  | -0.78 | -0.56 | 0.88  | -0.60 | -0.32 | 0.69  | 0.51  | 0.63  | 0.66  |
| $b_{10}-b_9/b_{10}+b_9$       | 0.02  | 0.47  | 0.90  | -0.69 | 0.65  | 0.30  | -0.22 | -0.02 | 0.86  | -0.59 | 0.09  | -0.04 | -0.10 |
| $b_{10}-b_8/b_{10}+b_8$       | 0.17  | -0.33 | -0.14 | 0.46  | -0.57 | -0.34 | 0.75  | -0.17 | -0.12 | 0.62  | 0.13  | 0.16  | 0.07  |
| $b_{10}-b_7/b_{10}+b_7$       | -0.48 | -0.68 | -0.04 | 0.28  | -0.55 | -0.16 | 0.70  | 0.48  | -0.09 | 0.81  | -0.48 | -0.42 | -0.54 |
| $b_{10}-b_6/b_{10}+b_6$       | -0.86 | -0.62 | -0.20 | 0.40  | -0.65 | -0.25 | 0.64  | 0.86  | -0.15 | 0.85  | -0.79 | -0.78 | -0.78 |
| $b_{10}-b_5/b_{10}+b_5$       | 0.63  | -0.23 | 0.28  | -0.14 | -0.27 | -0.09 | 0.51  | -0.63 | 0.32  | 0.44  | 0.56  | 0.65  | 0.48  |
| $b_{10}-b_4/b_{10}+b_4$       | 0.18  | -0.45 | -0.18 | 0.42  | -0.67 | -0.41 | 0.79  | -0.18 | -0.09 | 0.70  | 0.12  | 0.21  | 0.26  |
| $b_{10}-b_3/b_{10}+b_3$       | 0.23  | -0.45 | -0.18 | 0.42  | -0.67 | -0.41 | 0.79  | -0.23 | -0.09 | 0.70  | 0.16  | 0.26  | 0.30  |
| $b_{10}-b_2/b_{10}+b_2$       | 0.49  | -0.55 | -0.47 | 0.57  | -0.82 | -0.52 | 0.88  | -0.49 | -0.43 | 0.76  | 0.41  | 0.53  | 0.50  |
| $b_{10}-b_1/b_{10}+b_1$       | 0.51  | -0.47 | -0.39 | 0.54  | -0.78 | -0.56 | 0.88  | -0.51 | -0.32 | 0.69  | 0.42  | 0.55  | 0.57  |
| $b_9-b_8/b_9+b_8$             | 0.02  | -0.48 | -0.88 | 0.70  | -0.67 | -0.36 | 0.25  | -0.02 | -0.84 | 0.61  | -0.06 | 0.08  | 0.12  |
| $b_9-b_7/b_9+b_7$             | -0.66 | -0.48 | -0.88 | 0.70  | -0.67 | -0.36 | 0.25  | 0.66  | -0.84 | 0.61  | -0.67 | -0.58 | -0.56 |
| $b_9-b_6/b_9+b_6$             | -0.51 | -0.48 | -0.88 | 0.70  | -0.67 | -0.36 | 0.25  | 0.51  | -0.84 | 0.61  | -0.51 | -0.43 | -0.36 |
| $b_9-b_5/b_9+b_5$             | 0.45  | -0.18 | -0.58 | 0.25  | -0.37 | -0.21 | 0.03  | -0.45 | -0.53 | 0.31  | 0.35  | 0.49  | 0.51  |
| $b_9-b_4/b_9+b_4$             | 0.17  | -0.48 | -0.88 | 0.70  | -0.67 | -0.36 | 0.25  | -0.17 | -0.84 | 0.61  | 0.09  | 0.22  | 0.26  |

|                   |       |       |       |       |       |       |       |       |       |       |       |       |       |
|-------------------|-------|-------|-------|-------|-------|-------|-------|-------|-------|-------|-------|-------|-------|
| $b_9-b_3/b_9+b_3$ | 0.21  | -0.48 | -0.88 | 0.70  | -0.67 | -0.36 | 0.25  | -0.21 | -0.84 | 0.61  | 0.12  | 0.24  | 0.30  |
| $b_9-b_2/b_9+b_2$ | 0.48  | -0.48 | -0.88 | 0.70  | -0.67 | -0.36 | 0.25  | -0.48 | -0.84 | 0.61  | 0.38  | 0.51  | 0.54  |
| $b_9-b_1/b_9+b_1$ | 0.45  | -0.48 | -0.88 | 0.70  | -0.67 | -0.36 | 0.25  | -0.45 | -0.84 | 0.61  | 0.35  | 0.49  | 0.52  |
| $b_8-b_7/b_8+b_7$ | -0.46 | -0.75 | -0.10 | 0.28  | -0.55 | -0.17 | 0.57  | 0.46  | -0.15 | 0.85  | -0.42 | -0.40 | -0.52 |
| $b_8-b_6/b_8+b_6$ | -0.83 | -0.62 | -0.20 | 0.40  | -0.65 | -0.25 | 0.64  | 0.83  | -0.15 | 0.85  | -0.73 | -0.78 | -0.74 |
| $b_8-b_5/b_8+b_5$ | 0.63  | -0.37 | 0.24  | -0.25 | -0.30 | -0.03 | 0.43  | -0.63 | 0.30  | 0.54  | 0.60  | 0.65  | 0.48  |
| $b_8-b_4/b_8+b_4$ | 0.33  | -0.62 | -0.31 | 0.49  | -0.73 | -0.38 | 0.53  | -0.33 | -0.05 | 0.77  | 0.28  | 0.34  | 0.39  |
| $b_8-b_3/b_8+b_3$ | 0.56  | -0.55 | -0.25 | 0.34  | -0.73 | -0.38 | 0.65  | -0.56 | 0.00  | 0.73  | 0.51  | 0.56  | 0.63  |
| $b_8-b_2/b_8+b_2$ | 0.56  | -0.30 | -0.61 | 0.01  | -0.57 | -0.52 | 0.29  | -0.56 | -0.39 | 0.20  | 0.51  | 0.58  | 0.59  |
| $b_8-b_1/b_8+b_1$ | 0.59  | -0.08 | -0.47 | 0.12  | -0.65 | -0.74 | 0.51  | -0.59 | -0.19 | 0.26  | 0.53  | 0.62  | 0.65  |
| $b_7-b_6/b_7+b_6$ | 0.37  | -0.32 | -0.09 | 0.15  | -0.55 | -0.55 | 0.49  | -0.37 | 0.17  | 0.44  | 0.37  | 0.34  | 0.44  |
| $b_7-b_5/b_7+b_5$ | 0.80  | 0.82  | 0.32  | -0.42 | 0.68  | 0.22  | -0.69 | -0.80 | 0.37  | -0.89 | 0.77  | 0.76  | 0.70  |
| $b_7-b_4/b_7+b_4$ | 0.39  | 0.75  | 0.10  | -0.28 | 0.55  | 0.17  | -0.57 | -0.39 | 0.15  | -0.85 | 0.37  | 0.35  | 0.48  |
| $b_7-b_3/b_7+b_3$ | 0.40  | 0.75  | 0.10  | -0.28 | 0.55  | 0.17  | -0.57 | -0.40 | 0.15  | -0.85 | 0.38  | 0.35  | 0.49  |
| $b_7-b_2/b_7+b_2$ | 0.57  | 0.75  | 0.10  | -0.28 | 0.55  | 0.17  | -0.57 | -0.57 | 0.15  | -0.85 | 0.51  | 0.55  | 0.60  |
| $b_7-b_1/b_7+b_1$ | 0.59  | 0.75  | 0.10  | -0.28 | 0.55  | 0.17  | -0.57 | -0.59 | 0.15  | -0.85 | 0.53  | 0.57  | 0.67  |
| $b_6-b_5/b_6+b_5$ | 0.91  | 0.65  | 0.28  | -0.42 | 0.67  | 0.31  | -0.61 | -0.91 | 0.26  | -0.88 | 0.84  | 0.86  | 0.81  |
| $b_6-b_4/b_6+b_4$ | 0.66  | 0.63  | 0.18  | -0.28 | 0.67  | 0.28  | -0.66 | -0.66 | 0.12  | -0.87 | 0.57  | 0.63  | 0.71  |
| $b_6-b_3/b_6+b_3$ | 0.69  | 0.62  | 0.20  | -0.40 | 0.65  | 0.25  | -0.64 | -0.69 | 0.15  | -0.85 | 0.58  | 0.67  | 0.74  |
| $b_6-b_2/b_6+b_2$ | 0.88  | 0.62  | 0.20  | -0.40 | 0.65  | 0.25  | -0.64 | -0.88 | 0.15  | -0.85 | 0.79  | 0.85  | 0.80  |
| $b_6-b_1/b_6+b_1$ | 0.86  | 0.62  | 0.20  | -0.40 | 0.65  | 0.25  | -0.64 | -0.86 | 0.15  | -0.85 | 0.77  | 0.84  | 0.82  |
| $b_5-b_4/b_5+b_4$ | 0.00  | 0.05  | -0.62 | 0.52  | -0.23 | -0.37 | -0.04 | 0.00  | -0.48 | -0.20 | -0.03 | -0.04 | 0.13  |
| $b_5-b_3/b_5+b_3$ | 0.08  | 0.37  | -0.24 | 0.25  | 0.30  | 0.03  | -0.43 | -0.08 | -0.30 | -0.54 | 0.05  | 0.03  | 0.21  |
| $b_5-b_2/b_5+b_2$ | 0.53  | 0.25  | -0.43 | 0.25  | 0.17  | 0.04  | -0.38 | -0.53 | -0.50 | -0.38 | 0.44  | 0.51  | 0.58  |
| $b_5-b_1/b_5+b_1$ | -0.10 | 0.40  | -0.40 | 0.28  | 0.15  | -0.04 | -0.35 | 0.10  | -0.38 | -0.45 | -0.11 | -0.04 | 0.04  |
| $b_4-b_3/b_4+b_3$ | -0.15 | 0.72  | 0.64  | -0.53 | 0.92  | 0.72  | -0.72 | 0.15  | 0.56  | -0.86 | -0.09 | -0.19 | -0.17 |
| $b_4-b_2/b_4+b_2$ | 0.68  | 0.50  | 0.11  | -0.37 | 0.62  | 0.41  | -0.63 | -0.68 | 0.01  | -0.74 | 0.61  | 0.68  | 0.52  |
| $b_4-b_1/b_4+b_1$ | 0.03  | 0.65  | 0.28  | -0.42 | 0.67  | 0.31  | -0.61 | -0.03 | 0.26  | -0.88 | 0.03  | 0.08  | -0.02 |
| $b_3-b_2/b_3+b_2$ | 0.59  | 0.42  | -0.18 | -0.21 | 0.33  | 0.17  | -0.44 | -0.59 | -0.22 | -0.56 | 0.53  | 0.60  | 0.43  |
| $b_3-b_1/b_3+b_1$ | -0.06 | 0.60  | -0.25 | -0.16 | 0.17  | -0.14 | -0.26 | 0.06  | -0.21 | -0.52 | -0.06 | 0.00  | -0.11 |
| $b_2-b_1/b_2+b_1$ | -0.58 | -0.15 | 0.14  | 0.12  | -0.37 | -0.29 | 0.60  | 0.58  | 0.15  | 0.50  | -0.56 | -0.49 | -0.43 |
